# Supplementary material for: XYA-2: a marine-derived compound targeting apoptosis and multiple signaling pathways in pancreatic cancer
Source: PeerJ. 2024 Jan 16;12:e16805. doi: 10.7717/peerj.16805 (PMC10798151; doi:10.7717/peerj.16805)
Supplement: Supplemental Information 1 [file peerj-12-16805-s001.xlsx]

## Sheet: Fig1A
Viability of MIA-PaCa2, PANC-1 and PANC0203 cells treated with XYA-2 evaluated by 24-h and 72-h CCK8 assays
		XYA-2 (μΜ)
Bacground	DMSO	1.56	3.25	6.25	12.5	25	50	100	Cell line	Teatment time (h)
0.235	1.153	1.156	1.1586	0.945	0.8493	0.4237	0.3454	0.2563	MIA-PaCa2	24
0.2289	1.1796	1.2621	1.0793	1.0201	0.8894	0.4245	0.3406	0.2676
0.2372	1.4419	1.3679	1.2508	1.0716	0.8596	0.4298	0.3574	0.2422
0.2265	1.9578	1.8771	0.9409	0.5114	0.551	0.3225	0.2368	0.244	MIA-PaCa2	72
0.2232	1.9503	2.0815	0.9228	0.5826	0.5388	0.3032	0.2351	0.2429
0.2278	1.9978	1.8443	0.887	0.529	0.5619	0.321	0.2488	0.2478
0.2273	0.7423	0.7181	0.6494	0.657	0.631	0.4067	0.3835	0.2586	PANC-1	24
0.2291	0.7213	0.7527	0.6234	0.6669	0.6377	0.4027	0.3574	0.2653
0.2326	0.7178	0.7175	0.6654	0.656	0.5941	0.3941	0.3746	0.2641
0.2209	1.2787	1.1943	0.6088	0.613	0.5528	0.4379	0.2687	0.2622	PANC-1	72
0.2264	1.292	1.1899	0.6312	0.5914	0.5554	0.3445	0.2555	0.2615
0.2208	1.296	1.1921	0.6081	0.5729	0.4713	0.3598	0.2769	0.2645
0.058	1.1116	1.1769	1.3218	0.7993	0.8341	0.6884	0.1748	0.1748	PANC0203	24
0.0576	1.101	1.1775	1.3126	0.8765	0.8267	0.6272	0.1607	0.1607
0.058	1.1278	1.3659	1.2789	0.8573	0.8884	0.6776	0.1694	0.1694
0.0596	1.9869	1.3762	2.2882	0.5661	0.4529	0.2288	0.1512	0.1901	PANC0203	72
0.0621	1.8427	1.8513	2.4035	0.6377	0.4829	0.1787	0.1525	0.1854
0.0718	2.0941	1.6581	2.4279	0.5549	0.3504	0.1712	0.1773	0.1855

## Sheet: Fig1B
Clonogenicity of MIA-PaCa2 and PANC-1 cells treated with DMSO or XYA-2
XYA-2 (μΜ)	Count of MIA-PaCa2	Count of PANC-1
0	123	242
0	93	197
0	105	251
2	89	46
2	58	65
2	68	78

## Sheet: Fig2A
Analysis of cell cycle distribution in PANC-1 cells treated with XYA-2 for 24 hours using propidium iodide/RNase
		XYA-2 (μM)
	0	2	5
%G1	51.6	42.6	48.7
	56.7	45	50
	55	45	46.9
%S	25.1	28.1	29.5
	20.1	30.4	23.9
	23.2	26.2	28
%G2	22.4	28.9	22.5
	21.8	25	25.5
	20	29	25.4

## Sheet: Fig2B
Detection of apoptosis in MIA-PaCa2 and PANC-1 cells treated with compound XYA-2 at varying concentrations for 48 hours using FITC-Annexin V assay
	XYA-2 (μM)
	0	5	10
MIA-PaCa2	15.23	13.44	26.4
	16.52	17.88	27.18
	10.17	18.48	26.7
PANC-1	16.51	23.71	40
	14.36	23.58	26.4
	19.4	22.72	31.6

## Sheet: Fig3A
Wound closure of MIA-PaCa2 cells treated with compound XYA-2 at indicated concentrations for 24 hours and 36 hours
		Replication
Time (h)	XYA-2 (μM)	1	2	3	4	5	6
0h	0	395	455	411	320	413	386
	2	355	384	370	374	376	387
	5	388	416	391	394	371	380
	10	389	400	409	427	438	429
24h	0	234	293	259.01	251	275	257
	2	282	293	306	286.06	290	288
	5	388.01	349	357	342	354	349
	10	357	387	417	391	396	384
36h	0	173	122	160	124	138	147
	2	222	240	172	199.01	243.02	230.01
	5	315	321.01	300	305	279.02	306
	10	391	378	426	398	396	401

## Sheet: Fig3B
Transwell assay of PANC-1 and MIA-PaCa2 cells after 48 hours of treatment with compound XYA-2 at indicated concentrations
		Replication
	XYA-2 (μM)	1	2	3
MIA-PaCa2	0	716	861	747
	2	551	515	423
	5	262	316	269
PANC-1	0	1223	1452	1166
	2	431	783	794
	5	4	2	10

## Sheet: Fig5C
The mRNA expression levels of the specified genes in MIA-PaCa2 and PANC-1 cells were determined by qRT-PCR after treatment with various concentrations of XYA-2.
XYA-2 (μΜ)	GAPDH	KIF2C	KIF4A	MKI67	PLK1	SPC24	TOP2A
0	25.7988	22.4855	23.4172	21.3336	27.1761	29.1944	20.5426	MIA-PaCa2
0	25.664	22.4928	23.3989	21.9143	27.1447	29.394	20.6424
0	25.2404	23.0388	23.6766	21.7935	27.06	29.4106	20.5442
5	26.1684	25.0011	25.5773	24.2429	30.5345	31.5896	23.0623
5	26.3277	25.051	25.6939	24.401	31.2007	31.9184	23.3212
5	25.9574	24.8953	25.609	24.4263	30.8534	30.5505	23.025
10	26.2072	24.7501	25.9812	24.1173	30.3642	30.3032	23.5651
10	26.2671	25.0176	26.0502	24.3626	30.6319	30.8466	23.7508
10	26.3797	24.8141	25.7857	24.2349	30.5339	30.3871	23.6441
0	27.1375	22.1987	23.4257	21.4338	26.0063	26.8361	20.6068	PANC-1
0	27.8969	22.3158	23.5841	21.2338	26.6696	26.4775	20.6993
0	27.8164	22.1972	23.2317	21.9408	26.3662	26.3615	20.528
5	27.8944	26.0947	27.0704	24.3768	33.5452	33.808	24.1216
5	27.9098	26.159	27.0171	24.5874	35.7474	31.2262	24.5136
5	27.707	26.1213	26.6136	24.3585	31.1949	30.2452	24.3349
10	27.7451	27.067	27.6237	25.2284	30.5978	31.8957	25.0623
10	28.2675	27.1667	27.7133	25.2849	30.6556	30.7569	24.8765
10	27.8506	27.3114	27.6009	25.2038	30.2249	30.1149	25.0204
