# Supplementary material for: XYA-2: a marine-derived compound targeting apoptosis and multiple signaling pathways in pancreatic cancer
Source: PeerJ. 2024 Jan 16;12:e16805. doi: 10.7717/peerj.16805 (PMC10798151; doi:10.7717/peerj.16805)
Supplement: Supplemental Information 3 [file peerj-12-16805-s003.xls]

## Sheet: Sheet1
ITEM TO CHECK	IMPORTANCE	CHECKLIST
EXPERIMENTAL DESIGN
Definition of experimental and control groups	E	line 161
Number within each group	E	line 161
Assay carried out by core lab or investigator's lab?	D
Acknowledgement of authors' contributions	D
SAMPLE
Description	E	line 161
Volume/mass of sample processed	D	Not applicable
Microdissection or macrodissection	E	Not applicable
Processing procedure	E	Not applicable
If frozen - how and how quickly?	E	Not applicable
If fixed - with what, how quickly?	E	Not applicable
Sample storage conditions and duration (especially for FFPE samples)	E	Not applicable
NUCLEIC ACID EXTRACTION
Procedure and/or instrumentation	E	line 164
Name of kit and details of any modifications	E	line 164
Source of additional reagents used	D	Not applicable
Details of DNase or RNAse treatment	E	line 165
Contamination assessment (DNA or RNA)	E	line 165
Nucleic acid quantification	E	line 167
Instrument and method	E	line 167
Purity (A260/A280)	D	line 168
Yield	D
RNA integrity method/instrument	E	line 169
RIN/RQI or Cq of 3' and 5' transcripts	E	line 169
Electrophoresis traces	D
Inhibition testing (Cq dilutions, spike or other)	E	line 170
REVERSE TRANSCRIPTION
Complete reaction conditions	E	line 172-178
Amount of RNA and reaction volume	E	line 172
Priming oligonucleotide (if using GSP) and concentration	E	line 174
Reverse transcriptase and concentration	E	line 176
Temperature and time	E	line 176
Manufacturer of reagents and catalogue numbers	D	line 173
Cqs with and without RT	D*
Storage conditions of cDNA	D
qPCR TARGET INFORMATION
If multiplex, efficiency and LOD of each assay.	E	Not applicable
Sequence accession number	E	line 188
Location of amplicon	D
Amplicon length	E	line 183
In silico specificity screen (BLAST, etc)	E	line 182
Pseudogenes, retropseudogenes or other homologs?	D
Sequence alignment	D
Secondary structure analysis of amplicon	D
Location of each primer by exon or intron (if applicable)	E	Not applicable
What splice variants are targeted?	E	Not applicable
qPCR OLIGONUCLEOTIDES
Primer sequences	E	line 180-191
RTPrimerDB Identification Number	D
Probe sequences	D**
Location and identity of any modifications	E	Not applicable
Manufacturer of oligonucleotides	D
Purification method	D
qPCR PROTOCOL
Complete reaction conditions	E	line 192-
Reaction volume and amount of cDNA/DNA	E	line 192
Primer, (probe), Mg++ and dNTP concentrations	E	line 193
Polymerase identity and concentration	E	line 194
Buffer/kit identity and manufacturer	E	line 195-197
Exact chemical constitution of the buffer	D
Additives (SYBR Green I, DMSO, etc.)	E	line 196
Manufacturer of plates/tubes and catalog number	D
Complete thermocycling parameters	E	line 197
Reaction setup (manual/robotic)	D
Manufacturer of qPCR instrument	E	line 195
qPCR VALIDATION
Evidence of optimisation (from gradients)	D
Specificity (gel, sequence, melt, or digest)	E	line 198
For SYBR Green I, Cq of the NTC	E	line 198
Standard curves with slope and y-intercept	E	line 199
PCR efficiency calculated from slope	E	line 202
Confidence interval for PCR efficiency or standard error	D
r2 of standard curve	E	line 202
Linear dynamic range	E	line 203
Cq variation at lower limit	E	line 203
Confidence intervals throughout range	D
Evidence for limit of detection	E	line 205
If multiplex, efficiency and LOD of each assay.	E	Not applicable
DATA ANALYSIS
qPCR analysis program (source, version)	E	line 201
Cq method determination	E	line 202
Outlier identification and disposition	E	line 202
Results of NTCs	E	line 208
Justification of number and choice of reference genes	E	line 200
Description of normalisation method	E	line 200
Number and concordance of biological replicates	D
Number and stage (RT or qPCR) of technical replicates	E	line 201
Repeatability (intra-assay variation)	E	line 209
Reproducibility (inter-assay variation, %CV)	D
Power analysis	D
Statistical methods for result significance	E	line 213
Software (source, version)	E	line 213
Cq or raw data submission using RDML	D
Table 1. MIQE checklist for authors, reviewers and editors. All essential information (E) must be submitted with the manuscript. Desirable
information (D) should be submitted if available. If using primers obtained from RTPrimerDB, information on qPCR target, oligonucleotides,
protocols and validation is available from that source.
*: Assessing the absence of DNA using a no RT assay is essential when first extracting RNA. Once the sample has been validated as
RDNA-free, inclusion of a no-RT control is desirable, but no longer essential.
**: Disclosure of the probe sequence is highly desirable and strongly encouraged. However, since not all commercial pre-designed assay
vendors provide this information, it cannot be an essential requirement. Use of such assays is advised against.
